# Supplementary material for: The Moderating Effect of Social Participation on the Relationship between Urban Green Space and the Mental Health of Older Adults: A Case Study in China
Source: MDPI journal article supplement (doi:10.3390/land13030317), 2024-03-02
Supplement: s1 [file s1]

**Supplementary File S1:** Urban environmental characteristics of the data.

| Variable                         | Explanation                                                                                 | Measurement Method                                                      |
|----------------------------------|---------------------------------------------------------------------------------------------|-------------------------------------------------------------------------|
| Greening rate                    | Proportion of urban built-up area covered by greenery to total area of the built-up area    | Green coverage area of urban built-up areas/total area of built-up area |
| Urbanisation rate                | Proportion of urban permanent population to the total permanent population                  | Urban permanent population/total permanent population                   |
| Road density                     | Total mileage of the road network as a percentage of total urban area (km/km <sup>2</sup> ) | Total mileage of road network/total urban area                          |
| Population density               | Population per unit land area (persons /km <sup>2</sup> )                                   | Number of permanent urban residents/total urban area                    |
| Air quality (PM <sub>2.5</sub> ) | Particulate matter with diameters of 2.5 µm or less (PM <sub>2.5</sub> ) in the ambient air | Annual mean value for each city                                         |
| Tertiary hospitals               | Number of tertiary hospitals in the city                                                    | — —                                                                     |

Note: Data were obtained from the China Statistical Yearbook of 2018 [69].

**Supplementary File S2:** Dimensions and measurements of social participation, mental health, sense of safety, and community cohesion.

| Variable             | Cronbach's $\alpha$ | Cronbach's $\alpha$ Based on Standardised Terms | Explanation                                                                                                                                                                                                                                                                                                                                                                                                                                                                                                                                                                                                                                                                                                                                                                                                             |
|----------------------|---------------------|-------------------------------------------------|-------------------------------------------------------------------------------------------------------------------------------------------------------------------------------------------------------------------------------------------------------------------------------------------------------------------------------------------------------------------------------------------------------------------------------------------------------------------------------------------------------------------------------------------------------------------------------------------------------------------------------------------------------------------------------------------------------------------------------------------------------------------------------------------------------------------------|
| Social participation | 0.827               | 0.873                                           | <ol style="list-style-type: none"> <li>1. Frequency of recreational arts groups activities.</li> <li>2. Frequency of physical activity group activities.</li> <li>3. Frequency of senior citizens' association.</li> <li>4. Frequency of skill correspondence type group activities.</li> <li>5. Frequency of knowledge learning groups.</li> <li>6. Frequency of volunteer groups.</li> <li>7. Frequency of religious based groups.</li> </ol>                                                                                                                                                                                                                                                                                                                                                                         |
| Mental health        | 0.939               | 0.943                                           | <ol style="list-style-type: none"> <li>1. Worried about some small things.</li> <li>2. Don't want to eat; I have a bad appetite.</li> <li>3. Even with the help of family and friends, I still can't get rid of my depression.</li> <li>4. Feeling inferior to others.</li> <li>5. Unable to concentrate when doing things.</li> <li>6. Feeling down.</li> <li>7. Feeling that doing anything takes a lot of effort.</li> <li>8. Feeling hopeless about the future.</li> <li>9. Feeling like my life is a failure.</li> <li>10. Feeling scared.</li> <li>11. Poor sleep.</li> <li>12. Feeling unhappy.</li> <li>13. Speaking less than usual.</li> <li>14. Feeling lonely.</li> <li>15. Feeling that people are not very friendly to me.</li> <li>16. Feeling that life is meaningless.</li> <li>17. Crying.</li> </ol> |

18. Feeling nervous.

19. Feeling that people don't like me.

20. Feeling that life cannot continue.

Sense of  
safety

0.825

0.835

1. Worried about the risk of hanging out and  
staying.

2. Worried about the risk of going out alone at  
night.

3. Worried about house burglary.

4. Worried about the risk of being targeted if the  
money is exposed.

5. Worried about child abduction and trafficking.

Community  
cohesion

0.763

0.771

1. Neighbourhood familiarity.

2. Neighbourhood trust.

3. Neighbourhood help.

---
